# Supplementary material for: Identification of a unique Radical SAM methyltransferase required for the sp3-C-methylation of an arginine residue of methyl-coenzyme M reductase
Source: PubMed Central journal article supplement (PMC5943407; doi:10.1038/s41598-018-25716-x), 2018-05-09
Supplement: 41598_2018_25716_MOESM1_ESM.pdf [file 41598_2018_25716_MOESM1_ESM.pdf]

## **Supplementary Information of the manuscript:**

### **Identification of a unique Radical SAM methyltransferase required for the sp<sup>3</sup>-C-methylation of an arginine residue of methyl-coenzyme M reductase**

**Darja Deobald<sup>1</sup>, Lorenz Adrian<sup>2,3</sup>, Christian Schöne<sup>4</sup>, Michael Rother<sup>4</sup>, Gunhild Layer<sup>1\*</sup>**

<sup>1</sup>Leipzig University, Institute of Biochemistry, Brüderstraße 34, 04103 Leipzig, Germany

<sup>2</sup>Helmholtz Centre for Environmental Research – UFZ, Isotope Biogeochemistry, Permoserstraße 15, 04318 Leipzig, Germany

<sup>3</sup>Technische Universität Berlin, Chair of Geobiotechnology, Ackerstraße 74, 13355 Berlin, Germany

<sup>4</sup>Technische Universität Dresden, Institute of Microbiology, Zellescher Weg 20b, 01217 Dresden, Germany

Running title: Arginine methylation of methyl-coenzyme M reductase

\*Corresponding author:

Gunhild Layer, Leipzig University, Institute of Biochemistry, Brüderstraße 34, 04103 Leipzig, Germany, Tel.: +49 (0) 341 97 36996, Fax: +49 (0) 341 97 36919, E-Mail: [gunhild.layer@uni-leipzig.de](mailto:gunhild.layer@uni-leipzig.de)

Keywords: Radical SAM methyltransferase, sp<sup>3</sup>-C-methylation, methanogenesis, methyl-coenzyme M reductase, *Methanosarcina acetivorans*, methanogenesis marker protein 10, MCR, McrA, 5-C-(S)-methylarginine.

**Supplementary Table 1: List of organisms analyzed for the presence of the *mm10* gene and the gene for the potential B12-dependent Radical SAM methyltransferase (B12 RS MT). The locus-tags for the genes encoding the MCR subunits are also listed.**

| Organism / genome                                        | Locus_tag prefix | <i>mm10</i> gene <sup>a</sup> | <i>mcrA</i>          | <i>mcrB</i>          | <i>mcrG</i>          | B12 RS MT      | Methyl-Arg <sup>b</sup> | Methyl-Gln <sup>b</sup> |
|----------------------------------------------------------|------------------|-------------------------------|----------------------|----------------------|----------------------|----------------|-------------------------|-------------------------|
| 1 <i>Methanobacterium formicicum</i> BRM9                | BRM9             | <b>_RS04725</b>               | _RS04700<br>_RS10890 | _RS04720<br>_RS10875 | _RS04705<br>_RS10885 | _RS04730       |                         |                         |
| 2 <i>Methanobacterium</i> sp. AL-21                      | METBO            | <b>_0348</b>                  | _0353<br>_2281       | _0349<br>_2278       | _0352<br>_2280       | —              |                         |                         |
| 3 <i>Methanobacterium</i> sp. SWAN-1                     | MSWAN            | <b>_2061</b>                  | _2056                | _2060                | _2057                | —              |                         |                         |
| 4 <i>Methanobacterium</i> sp. MB1                        | MBMB1            | <b>_RS08205</b>               | _RS08180<br>_RS08890 | _RS08200<br>_RS08875 | _RS08185<br>_RS08885 | _RS08210       |                         |                         |
| 5 <i>Methanobrevibacter ruminantium</i> M1               | MRU              | <b>_1929</b>                  | _1924                | _1928                | _1925                | —              |                         |                         |
| 6 <i>Methanobrevibacter smithii</i> DSMZ 861             | MSM              | <b>_1020</b>                  | _1015<br>_0902       | _1019<br>_0905       | _1016<br>_0903       | —              |                         |                         |
| 7 <i>Methanobrevibacter</i> sp. AbM4                     | ABM4             | <b>_1531</b>                  | _1526                | _1530                | _1527                | —              |                         |                         |
| 8 <i>Methanosphaera stadtmanae</i> DSM 3091              | MSP              | <b>_0298</b>                  | _0321                | _0318                | _0320                | —              |                         |                         |
| 9 <i>Methanothermobacter marburgensis</i> Marburg        | MTBMA            | <b>_C15530</b>                | _C15480<br>_C15120   | _C15520<br>_C15150   | _C15490<br>_C15130   | _C15540        | yes<br>yes              | yes<br>yes              |
| 10 <i>Methanothermobacter</i> sp. CaT2                   | MTCT             | <b>_RS05395</b>               | _RS05370<br>_RS05195 | _RS05390<br>_RS05210 | _RS05375<br>_RS05200 | _RS05400       |                         |                         |
| 11 <i>Methanothermobacter thermautotrophicus</i> Delta H | MTH              | <b>1170</b>                   | 1164<br>1129         | 1168<br>1132         | 1165<br>1130         | 1171           |                         |                         |
| 12 <i>Methanothermobacter wolfeii</i>                    | MWIV6            | <b>_RS07565</b>               | _RS07540             | _RS07560             | _RS07545             | _RS07570       | yes                     | yes                     |
| 13 <i>Methanothermus fervidus</i> DSM 2088               | MFER             | <b>_0789</b>                  | _0784<br>_0734       | _0788<br>_0731       | _0785<br>_0733       | _0790          |                         |                         |
| 14 <i>Methanocaldococcus fervens</i> AG86                | MEFER            | <b>_0933</b>                  | _0938                | _0934                | _0937                | _1125          |                         |                         |
| 15 <i>Methanocaldococcus infernus</i> ME                 | METIN            | <b>_0607</b>                  | _0281                | _0285                | _0282                | _0104          |                         |                         |
| 16 <i>Methanococcus jannaschii</i> DSM 2661              | MJ               | <b>_0841</b>                  | _0846<br>_0083       | _0842<br>_0081       | _0845<br>_0082       | _0865          | yes                     | yes                     |
| 17 <i>Methanocaldococcus</i> sp. FS406-22                | MFS40622         | <b>_1320</b>                  | _1315<br>_0424       | _1319<br>_0426       | _1316<br>_0425       | _1297          |                         |                         |
| 18 <i>Methanocaldococcus</i> sp. JH146                   | JH146            | <b>_RS05395</b>               | _RS05370<br>_RS02560 | _RS05390<br>_RS02570 | _RS05375<br>_RS02565 | _RS05265       |                         |                         |
| 19 <i>Methanocaldococcus vulcanius</i> M7                | METVU            | <b>_0144</b>                  | _0149<br>_1194       | _0145<br>_1192       | _0148<br>_1193       | _0282          |                         |                         |
| 20 <i>Methanotorris igneus</i> Kol 5                     | METIG            | <b>_1232</b>                  | _1237<br>_0445       | _1233<br>_0442       | _1236<br>_0444       | _0268          |                         |                         |
| 21 <i>Methanotorris formicicus</i> DSM 16983             | MetfoDRAFT       | <b>_0543</b>                  | _0538<br>_1092       | _0542<br>_1089       | _0539<br>_1091       | —              | yes<br>yes              | yes<br>yes              |
| 22 <i>Methanococcus aeolicus</i> Nankai-3                | MAEO             | <b>_1262</b>                  | _1268                | _1264                | _1267                | _0800          |                         |                         |
| 23 <i>Methanococcus maripaludis</i> S2                   | MMP              | <b>1554</b>                   | 1559                 | 1555                 | 1558                 | 1350           |                         |                         |
| 24 <i>Methanococcus vannielii</i> SB                     | MEVAN            | <b>_0867</b>                  | _0872                | _0868                | _0871                | _0661          |                         |                         |
| 25 <i>Methanococcus voltae</i> A3                        | MVOL             | <b>_1123</b>                  | _1128                | _1124                | _1127                | _0045<br>_0105 | n.f.                    | yes                     |
| 26 <i>Methanothermococcus okinawensis</i> IH1            | METOK            | <b>_0961</b>                  | _0956                | _0960                | _0957                | _0502          |                         |                         |

|    |                                                          |            |                 |                      |                      |                      |            |     |     |
|----|----------------------------------------------------------|------------|-----------------|----------------------|----------------------|----------------------|------------|-----|-----|
| 27 | <i>Methanothermococcus thermolithotrophicus</i> DSM 2095 | F555       | _RS0101870      | _RS0108305           | _RS0108290           | _RS0108300           | _RS0101405 | yes | yes |
| 28 | uncultured methanogenic archaeon RC-I                    | LRC180     | LRC180          | RCIX2063             | RCIX2059             | RCIX2062             | —          |     |     |
| 29 | <i>Methanocella conradii</i> HZ254                       | MTC        | _1160           | _0908                | _0904                | _0907                | —          |     |     |
| 30 | <i>Methanocella paludicola</i> - SANAE                   | MCP        | _1925           | _0516                | _0512                | _0515                | —          |     |     |
| 31 | <i>Methanocorpusculum labreanum</i> Z                    | MLAB       | _1316           | _1068<br>_1561       | _1066<br>_1565       | _1067<br>_1562       | —          |     |     |
| 32 | <i>Methanoculleus bourgensis</i> MS2                     | BN140      | _2007           | _1521<br>_1738       | _1524<br>_1734       | _1522<br>_1737       | _0208      |     |     |
| 33 | <i>Methanoculleus marisnigri</i> JR1                     | MEMAR      | _1632           | _0378<br>_0613       | _0375<br>_0617       | _0377<br>_0614       | _0391      |     |     |
| 34 | <i>Methanoculleus thermophilus</i> DSM 3915              | MCUTH      | _RS00145        | _RS07565<br>_RS06280 | _RS07580<br>_RS06260 | _RS07570<br>_RS06275 | _RS07515   | yes | yes |
| 35 | <i>Methanofollis liminatans</i> DSM 4140                 | METLI      | _1634           | _0498<br>_1710       | _0502<br>_1713       | _0499<br>_1711       | _2127      |     |     |
| 36 | <i>Methanoplanus petrolearius</i> DSM 11571              | MPET       | _2296           | _2415<br>_1991       | _2419<br>_1993       | _2416<br>_1992       | _2151      |     |     |
| 37 | <i>Methanomicrobium mobile</i> BP                        | T502       | _RS08355        | _RS04680             | _RS04700             | _RS04685             | —          |     |     |
| 38 | <i>Methanoplanus limicola</i> DSM 2279                   | METLIM     | _2412           | _2882                | _2886                | _2883                | _2560      |     |     |
| 39 | <i>Methanolinea tarda</i> NOBI-1                         | METTADRAFT | _RS00730        | _RS08625             | _RS08605             | _RS08620             | —          |     |     |
| 40 | <i>Methanoregula boonei</i> 6A8                          | MBOO       | _1781           | _0582                | _0586                | _0583                | —          |     |     |
| 41 | <i>Methanoregula formicicum</i> SMSP                     | METFOR     | _1315           | _0874<br>_2609       | _0871<br>_2605       | _0873<br>_2608       | —          |     |     |
| 42 | <i>Methanosphaerula palustris</i> E1-9c                  | MPAL       | _1909           | _2309                | _2305                | _2308                | —          |     |     |
| 43 | <i>Methanospirillum hungatei</i> JF-1                    | MHUN       | _2512           | _2148                | _2144                | _2147                | _2167      |     |     |
| 44 | <i>Methanoperedens nitroreducens</i> (ANME-2d)           | ANME2D     | _RS07350        | _RS05350             | _RS05335             | _RS05345             | —          |     |     |
| 45 | <i>Methanosaeta concilii</i> GP6                         | MCON       | _1242<br>_2443  | _0759                | _0762                | _0760                | _0758      |     |     |
| 46 | <i>Methanosaeta harundinacea</i> 6Ac                     | MHAR       | <b>_0503</b>    | _0498                | _0495                | _0497                | _0502      |     |     |
| 47 | <i>Methanosaeta thermophila</i> PT                       | MTHE       | _0508           | _0569                | _0572                | _0570                | _0558      |     |     |
| 48 | <i>Methanococcoides burtonii</i> DSM 6242                | MBUR       | <b>_2422</b>    | _2417                | _2421                | _2418                | —          |     |     |
| 49 | <i>Methanococcoides methylutens</i> MM1                  | MCMEM      | <b>_RS03025</b> | _RS03000             | _RS03020             | _RS03005             | —          |     |     |
| 50 | <i>Methanohalobium evestigatum</i> Z-7303                | METEV      | <b>_0908</b>    | _0902                | _0906                | _0903                | —          |     |     |
| 51 | <i>Methanohalophilus mahii</i> DSM 5219                  | MMAH       | <b>_0617</b>    | _0612                | _0616                | _0613                | —          |     |     |
| 52 | <i>Methanobolbus psychrophilus</i> R15                   | MPSY       | <b>_0834</b>    | _0828                | _0832                | _0829                | —          |     |     |
| 53 | <i>Methanomethylovorans hollandica</i> DSM 15978         | METHO      | <b>_1665</b>    | _1670                | _1666                | _1669                | —          |     |     |
| 54 | <i>Methanosalsum zhilinae</i> DSM 4017                   | MZHIL      | _1044           | _0857                | _0853                | _0856                | —          |     |     |
| 55 | <i>Methanosarcina acetivorans</i> C2A                    | MA         | <b>4551</b>     | 4546                 | 4550                 | 4547                 | —          | yes | no  |
| 55 | <i>Methanosarcina barkeri</i>                            | MBAR       | <b>_A0898</b>   | _A0893               | _A0897               | _A0894               | —          | yes | no  |

| Fusaro |                                                                                 |        |                 |                    |                    |                    |       |     |     |
|--------|---------------------------------------------------------------------------------|--------|-----------------|--------------------|--------------------|--------------------|-------|-----|-----|
| 56     | <i>Methanosarcina horonobensis</i><br>HB-1                                      | MSHOH  | <b>_RS00435</b> | _RS00460           | _RS00440           | _RS00455           | —     |     |     |
| 57     | <i>Methanosarcina lacustris</i><br>Z-7289                                       | MSLAZ  | <b>_RS00875</b> | _RS00850           | _RS00870           | _RS00855           | —     |     |     |
| 58     | <i>Methanosarcina mazei</i><br>Goel                                             | MM     | <b>_1245</b>    | _1240              | _1244              | _1241              | —     |     |     |
| 59     | <i>Methanosarcina siciliae</i><br>C2J                                           | MSSAC  | <b>_RS22375</b> | _RS22400           | _RS22380           | _RS22395           | —     |     |     |
| 60     | <i>Methanosarcina sp. Kolksee</i>                                               | MSKOL  | <b>_RS17995</b> | _RS17970           | _RS17990           | _RS17975           | —     |     |     |
| 61     | <i>Methanosarcina sp. WH1</i>                                                   | MSWH1  | <b>_RS00455</b> | _RS00480           | _RS00460           | _RS00475           | —     |     |     |
| 62     | <i>Methanosarcina thermophila</i><br>CHTI-55                                    | MSTHC  | <b>_1650</b>    | _1645              | _1649              | _1646              | —     |     |     |
| 63     | <i>Methanosarcina vacuolata</i><br>Z-761                                        | MSVAZ  | <b>_RS18095</b> | _RS18070           | _RS18090           | _RS18075           | —     |     |     |
| 64     | <i>Methermicoccus shengliensis</i><br>DSM 18856                                 | BP07   | <b>_RS05325</b> | _RS04365           | _RS04345           | _RS04360           | —     |     |     |
| 65     | <i>Methanopyrus kandleri</i><br>AV19                                            | MK     | <b>0650</b>     | 0655               | 0651               | 0654               | 0797  | yes | yes |
| 66     | <i>Methanomethylophilus alvus</i><br>Mx1201                                     | MMALV  | —               | _04000             | _03970             | _03990             | —     |     |     |
| 67     | <i>Methanoplasma termitum</i><br>MpT1                                           | MPT1   | —               | _RS01010           | _RS00995           | _RS01005           | —     |     |     |
| 68     | <i>Methanomassiliicoccus intestinalis</i><br>Issoire-Mx1                        | H729   | —               | _07305             | _07320             | _07310             | —     |     |     |
| 69     | <i>Methanonatronarchaeum</i><br><i>thermophilum</i> AMET1                       | AMET1  | —               | _1463              | _1459              | _1461              | —     |     |     |
| 70     | <i>C. 'Methanohalarchaeum</i><br><i>thermophilum'</i> HMET1                     | BTN85  | —               | _0917              | _0914              | _0916              | —     |     |     |
| 71     | <i>C. 'Methanofastidiosum</i><br><i>methylthioreducens'</i><br>U11si0528_Bin055 | AMQ22  | —               | _00302             | _00305             | _00303             | —     |     |     |
| 72     | <i>C. 'Methanomethylicus</i><br><i>mesodigestum'</i>                            | V1_s30 | —               | _89                | _91                | _90                | —     |     |     |
| 73     | <i>C. 'Methanomethylicus</i><br><i>oleusabulum'</i>                             | V3_s66 | —               | _30                | _28                | _29                | —     |     |     |
| 74     | <i>C. 'Methanosuratus petracarbonis'</i>                                        | V4_s73 | —               | _10                | _12/13             | _11                | —     |     |     |
| 75     | <i>C. Bathyarchaeota</i> archaeon BA1                                           | AOA65  | —               | _0408              | _0407              | _0406              | —     |     |     |
| 76     | <i>C. Bathyarchaeota</i> archaeon BA2                                           | AOA66  | —               | _1761              | _1769              | _1770              | _1763 |     |     |
| 77     | ANME-1 cluster archaeon<br>ex4572_4                                             | B6V00  | —               | _01170             | _01180             | _01175             | —     | no  | no  |
| 78     | ANME-2 cluster<br><i>C. 'Syntrophoarchaeum</i><br><i>butanivorans'</i>          | SBU    | —               | _000718<br>_001343 | _000719<br>_001341 | _001009<br>_001327 | —     |     |     |

<sup>a</sup>*mm10* genes in direct vicinity to the *mcr* operon are highlighted in bold.

<sup>b</sup>experimental evidence for the presence (yes) or absence (no) of 5-methylarginine and 2-methylglutamine.

1 **Supplementary Table 2: nLC/HR-ESI-MS/MS data for the precursor peptide  $^{275}\text{V-L}_{296}$  of McrA from *M. acetivorans* WWM1 and Mko4551.** The presence  
 2 of the Arg285 methylation in the wild-type (wt) strain and the absence of the modification in the Mko4551 strain (ko) were included for the calculation of the  
 3  $[\text{M}+\text{H}]^+$ . The determined fragment masses (Da) of the respective precursor peptides are shown. The amino acid (AA) residue Arg285 is underlined, c ions are  
 4 highlighted in green and z ions in red.

| $^{275}\text{V-R}_{285}\text{-L}_{296}$ wt: expected |                  | wt: measured $[\text{M}+\text{H}]^+$ |                         | c  | AA       | z  | $^{275}\text{V-L}_{296}$ ko: expected $[\text{M}+\text{H}]^+$ |                  | ko: measured $[\text{M}+\text{H}]^+$ |                         |
|------------------------------------------------------|------------------|--------------------------------------|-------------------------|----|----------|----|---------------------------------------------------------------|------------------|--------------------------------------|-------------------------|
| 117.1023                                             |                  |                                      |                         | 1  | V        | 21 | 117.1023                                                      |                  |                                      |                         |
| 204.1342                                             | 2094.0434        |                                      |                         | 2  | S        | 20 | 204.1343                                                      | 2080.0234        |                                      |                         |
| 335.1748                                             | 2007.0114        | <b>335.1748</b>                      |                         | 3  | M        | 19 | 335.1748                                                      | 1992.9914        |                                      |                         |
| 392.1963                                             | 1875.9709        | <b>392.1962</b>                      |                         | 4  | G        | 18 | 392.1963                                                      | 1861.9509        | <b>392.1962</b>                      |                         |
| 521.2389                                             | 1818.9494        | <b>521.2388</b>                      |                         | 5  | E        | 17 | 521.2389                                                      | 1804.9294        | <b>521.2388</b>                      |                         |
| 652.2793                                             | 1688.9068        | <b>652.2793</b>                      |                         | 6  | M        | 16 | 652.2793                                                      | 1675.8868        | <b>652.2793</b>                      |                         |
| 765.3634                                             | 1558.8663        |                                      |                         | 7  | L        | 15 | 765.3634                                                      | 1544.8463        |                                      |                         |
| 862.4162                                             | 1445.7823        | <b>862.4161</b>                      |                         | 8  | P        | 14 | 862.4162                                                      | 1431.7623        |                                      |                         |
| 933.4533                                             | 1348.7295        | <b>933.4532</b>                      | <b>1348.7318</b>        | 9  | A        | 13 | 933.4533                                                      | 1334.7095        | <b>933.4532</b>                      | <b>1334.7162</b>        |
| 1089.5544                                            | 1277.6924        | <b>1089.5533</b>                     | <b>1277.6947</b>        | 10 | R        | 12 | 1089.5544                                                     | 1263.6724        | <b>1089.5520</b>                     | <b>1263.6791</b>        |
| <u>1259.6755</u>                                     | <u>1121.5913</u> | <u><b>1259.6697</b></u>              | <u><b>1121.5936</b></u> | 11 | <u>R</u> | 11 | <u>1245.6555</u>                                              | <u>1107.5713</u> | <u><b>1245.6526</b></u>              | <u><b>1107.5780</b></u> |
| 1330.7126                                            | 951.4702         |                                      | <b>951.4768</b>         | 12 | A        | 10 | 1316.6926                                                     | 951.4702         |                                      | <b>951.4768</b>         |
| 1486.8137                                            | 880.4331         |                                      | <b>880.4397</b>         | 13 | R        | 9  | 1472.7937                                                     | 880.4331         |                                      | <b>880.4397</b>         |
| 1543.8352                                            | 724.3319         |                                      | <b>724.3386</b>         | 14 | G        | 8  | 1529.8152                                                     | 724.3319         |                                      |                         |
| 1640.8880                                            | 667.3105         |                                      |                         | 15 | P        | 7  | 1626.8680                                                     | 667.3105         |                                      |                         |
| 1754.9309                                            | 570.2577         |                                      | <b>570.2644</b>         | 16 | N        | 6  | 1740.9109                                                     | 570.2577         |                                      |                         |
| 1883.9735                                            | 456.2148         |                                      |                         | 17 | E        | 5  | 1869.9535                                                     | 456.2148         |                                      |                         |
| 1981.0262                                            | 327.1722         |                                      |                         | 18 | P        | 4  | 1967.0062                                                     | 327.1722         |                                      |                         |
| 2038.0477                                            | 230.1194         |                                      |                         | 19 | G        | 3  | 2024.0277                                                     | 230.1194         |                                      |                         |
| 2095.0692                                            | 173.0980         |                                      |                         | 20 | G        | 2  | 2081.0492                                                     | 173.0980         |                                      |                         |
|                                                      | 116.0765         |                                      |                         | 21 | L        | 1  |                                                               | 116.0765         |                                      |                         |

5

6 **Supplementary Table 3: Primers and plasmids used in this study.** 15 nt overhangs complementary  
 7 to pJK301 are underlined.

| Primers/Plasmids | Sequence                                                                            | Application                                       |
|------------------|-------------------------------------------------------------------------------------|---------------------------------------------------|
| UP-fw            | <u>AGCCTACACAAGCTATTA</u> AACTTTCGTATTAAGAG                                         | PCR amplification                                 |
| UP-rev           | CGGGCCCCCCTCGATGATTGCTGCAATGTGGTTGGC                                                | PCR amplification                                 |
| DOWN-fw          | <u>ACCGCGGTGGCGGCCCA</u> AGGAAGTGGATAAGGAAG                                         | PCR amplification                                 |
| DOWN-rev         | <u>GCAGCCCGGGGGATCG</u> AAACGGTCTTTATTCCGGG                                         | PCR amplification                                 |
| Ma5              | ATCCTACTGCGACACCCTG                                                                 | Confirmation of the mutant strain and sequencing  |
| Ma6              | TCGGTCATGAGAATCACTCC                                                                | Confirmation of the mutant strain and sequencing  |
| DD15             | ATATGGAAGTAGTTGTCGACGTAG                                                            | Amplification of <i>ma4551</i>                    |
| DD73             | CAAGGAAGTGGATAAGGAAGCCCA                                                            | Amplification of <i>ma4551</i>                    |
| pJK301           | pBluescript-based vector containing Frt- <i>pac-hpt</i> -Frt construct <sup>1</sup> | Linear cassette for the deletion of <i>ma4551</i> |

8

9

10 **Supplementary Table 4: Strains used in this study.**

| Strain                        | Genotype                                                                                                                                                                                                                                                           | Reference    |
|-------------------------------|--------------------------------------------------------------------------------------------------------------------------------------------------------------------------------------------------------------------------------------------------------------------|--------------|
| <i>E. coli</i> DH10B          | F <sup>-</sup> , <i>mcrA</i> , $\Delta(mrr-hsdRMS-mcrBC)$ , $\Delta lacX74$ , $\Phi 80$ , <i>lacZ</i> $\Delta M15$ , <i>recA1</i> , <i>endA1</i> , <i>araD139</i> , $\Delta(ara, leu)$ , 7697, <i>galU</i> , <i>galK</i> , <i>rpsL</i> , <i>nupG</i> , $\lambda^-$ | <sup>2</sup> |
| <i>M. acetivorans</i> WWM1    | C2A, $\Delta hpt$                                                                                                                                                                                                                                                  | <sup>3</sup> |
| <i>M. acetivorans</i> Mko4551 | WWM1, $\Delta ma4551::frt-pac-hpt-frt$                                                                                                                                                                                                                             | This study   |

11

12

13 **Supplementary Figure 1**

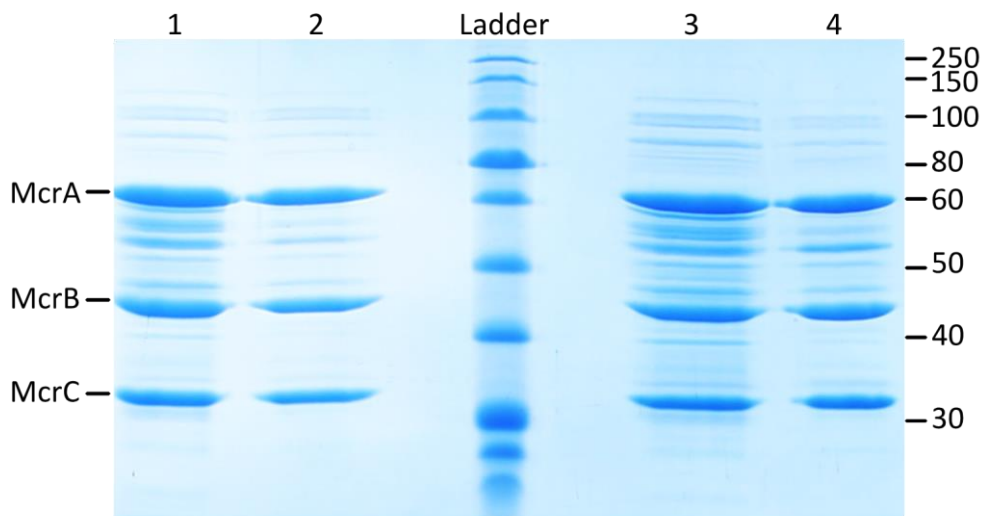

14

15 **Figure 1: SDS-PAGE analysis of the methyl-coenzyme M reductase fractions after purification by**  
16 **anion exchange chromatography (AIEX) and size exclusion chromatography (SEC).** Lane 1:  
17 pooled fractions containing MCR from *M. acetivorans* WWM1 after AIEX, lane 2: pooled fractions  
18 containing MCR from *M. acetivorans* WWM1 after AIEX and SEC, lane 3: pooled fractions containing  
19 MCR from *M. acetivorans* Mko4551 after AIEX and lane 4: pooled fractions containing MCR from  
20 *M. acetivorans* Mko4551 after AIEX and SEC. McrA: methyl-coenzyme M reductase,  $\alpha$  subunit; McrB:  
21 methyl-coenzyme M reductase,  $\beta$  subunit and McrC: methyl-coenzyme M reductase,  $\gamma$  subunit. Ladder:  
22 Broad Range Protein Ladder (10-250 kDa, New England BioLabs).

23

24 **Supplementary Figure 2**

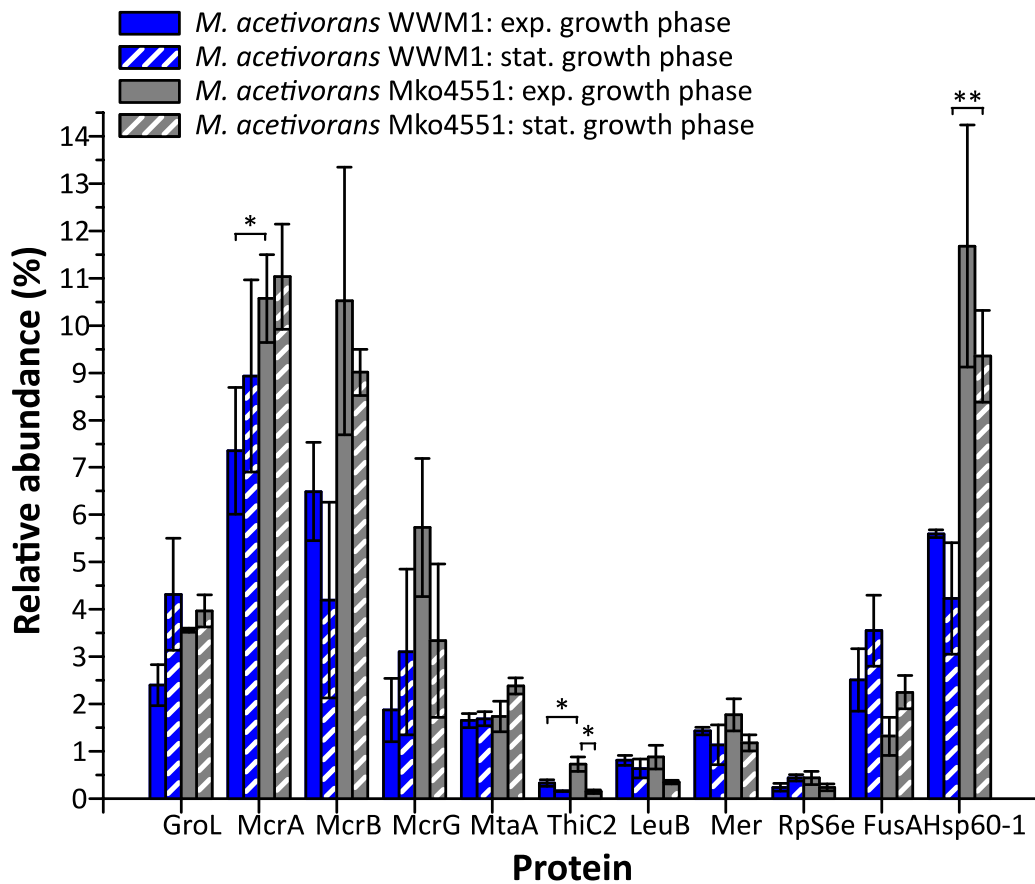

25

26 **Figure 2: Label-free quantification of the most abundant proteins in *M. acetivorans* and**  
 27 **calculation of the average protein relative abundance in relation to the overall protein content via**  
 28 **nLC/HR-ESI-MS/MS.** GroL: 60 kDa chaperonin; McrA: methyl-coenzyme M reductase,  $\alpha$  subunit;  
 29 McrB: methyl-coenzyme M reductase,  $\beta$  subunit; McrG: methyl-coenzyme M reductase,  $\gamma$  subunit;  
 30 MtaA: methylcobamide:CoM methyltransferase isozyme M; ThiC2: phosphomethylpyrimidine  
 31 synthase 2; LeuB: isocitrate/isopropylmalate dehydrogenase family protein; Mer: 5,10-  
 32 methylenetetrahydromethanopterin reductase; RpS6e: 30S ribosomal protein S6e; FusA: elongation  
 33 factor 2; Hsp60-1: heat shock protein 60. Paired two-sample *t*-test of three replicates and standard  
 34 deviation are shown (\*  $p < 0.05$ , \*\*  $p < 0.01$ ).

35



36 **Supplementary Figure 3**

37

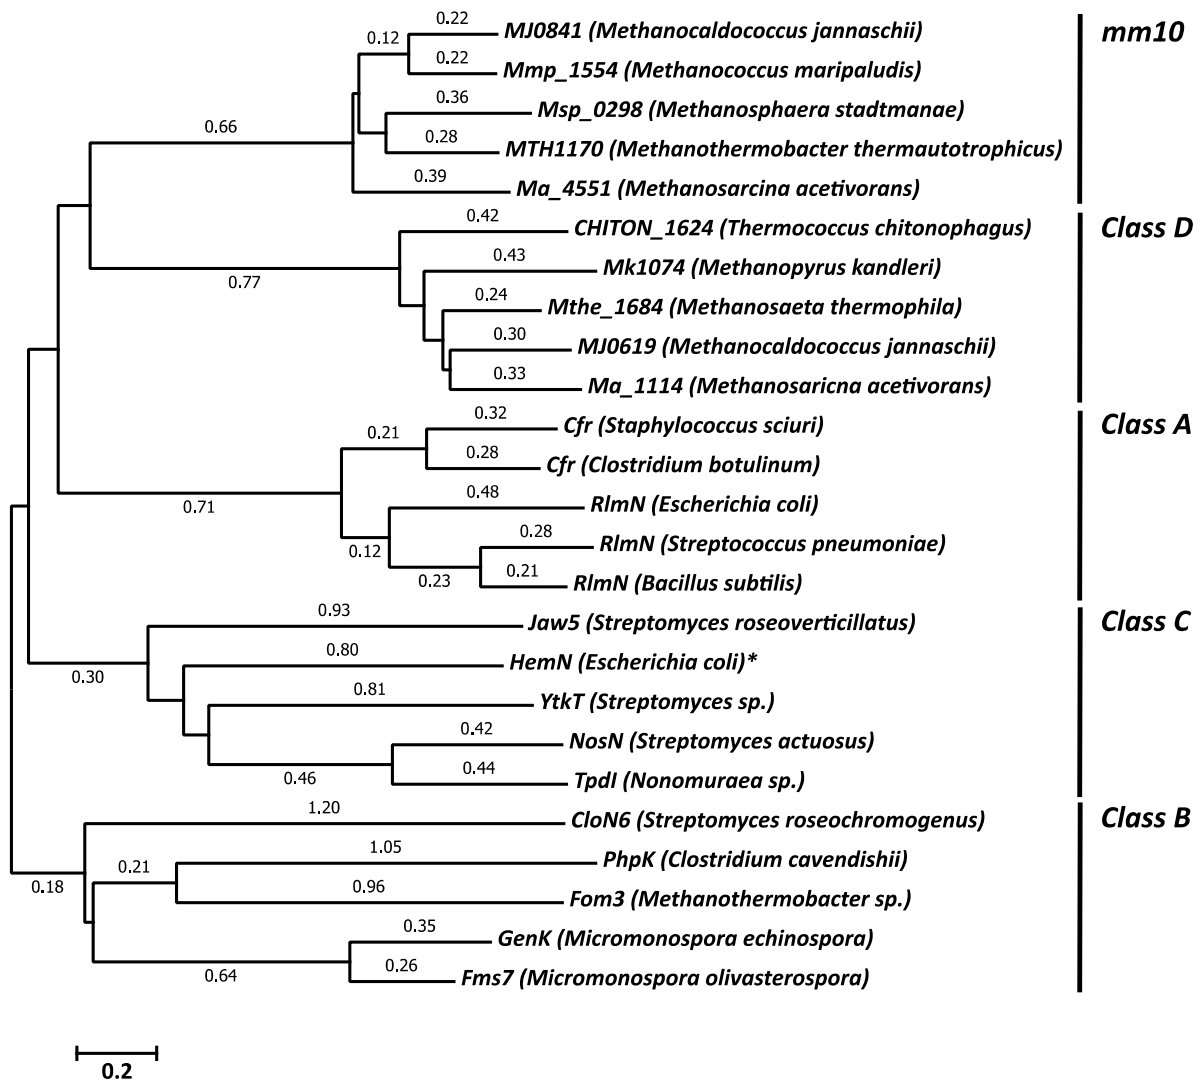

38

39 **Figure 3: Phylogenetic tree of representatives of the four Radical SAM methyltransferase classes**  
 40 **A-D and mm10.** The evolutionary relationship was inferred using the Neighbor-Joining method<sup>4</sup>. The  
 41 optimal tree with the sum of branch length = 17.1890 is shown. The tree is drawn to scale, with branch  
 42 lengths (indicated above the branches) in the same units as those of the evolutionary distances used to  
 43 infer the phylogenetic tree. The analysis comprised 25 amino acid sequences and was conducted in  
 44 MEGA7<sup>5</sup>. \*HemN is the Radical SAM enzyme coproporphyrinogen III dehydrogenase and not a  
 45 methyltransferase. It was included in the analysis, because the Class C methyltransferases contain a C-  
 46 terminal HemN-like domain.

47

48



54

55 **References**

- 56 1. Welander, P. V. & Metcalf, W. W. Mutagenesis of the C1 oxidation pathway in  
57 *Methanosarcina barkeri*: new insights into the Mtr/Mer bypass pathway. *J Bacteriol* **190**,  
58 1928–1936 (2008).
- 59 2. Durfee, T. *et al.* The complete genome sequence of *Escherichia coli* DH10B. Insights into  
60 the biology of a laboratory workhorse. *J Bacteriol* **190**, 2597–2606 (2008).
- 61 3. Pritchett, M. A., Zhang, J. K. & Metcalf, W. W. Development of a markerless genetic  
62 exchange method for *Methanosarcina acetivorans* C2A and its use in construction of new  
63 genetic tools for methanogenic Archaea. *Appl. Environ. Microbiol.* **70**, 1425–1433 (2004).
- 64 4. Saitou, N. & Nei, M. The neighbor-joining method. A new method for reconstructing  
65 phylogenetic trees. *Mol Biol Evol* **4**, 406–425 (1987).
- 66 5. Kumar, S., Stecher, G. & Tamura, K. MEGA7. Molecular evolutionary genetics analysis  
67 Version 7.0 for bigger datasets. *Mol Biol Evol* **33**, 1870–1874 (2016).
